# Supplementary material for: Extremely stretchable and tough hybrid hydrogels based on gelatin, κ-carrageenan and polyacrylamide
Source: Royal Society of Chemistry journal article supplement (doi:10.1039/d1sm01135a), 2021-01-01
Supplement: d1sm01135a1.pdf [file d1sm01135a1.pdf]

## Supporting Information

### **Extremely Stretchable and Tough Hybrid Hydrogels Based on Gelatin, $\kappa$ -Carrageenan and Polyacrylamide**

Xingyue Sun<sup>a</sup>, Lina Ye<sup>\*,b</sup>, Haiyi Liang<sup>\*,c,d</sup>

<sup>a</sup> Wendian College, Anhui University, Hefei, Anhui 230601, China

<sup>b</sup> College of Chemical engineering, Anhui University, Hefei, Anhui 230601, China

<sup>c</sup> CAS Key Laboratory of Mechanical Behavior and Design of Materials, University of Science and Technology of China, Hefei, Anhui 230026, China

<sup>d</sup> IAT-Chungu Joint Laboratory for Additive Manufacturing, Anhui Chungu 3D printing Institute of Intelligent Equipment and Industrial Technology, Wuhu, Anhui 241200, China

\* Corresponding Author

## Supplementary figures

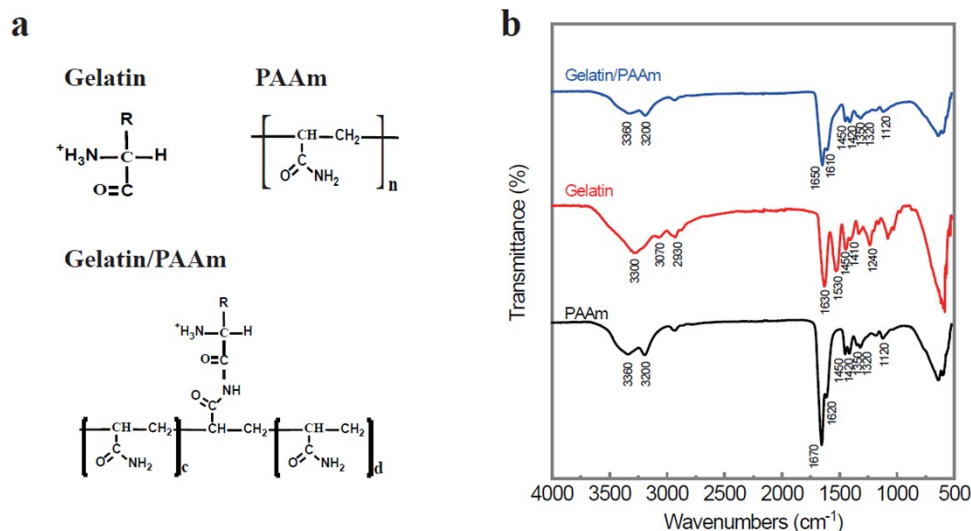

**Fig. S1** (a) Chemical structure of gelatin, PAAm and gelatin/PAAm. (b) ATR-IR spectra of PAAm, gelatin/PAAm, gelatin/ $\kappa$ -carrageenan/PAAm gels.

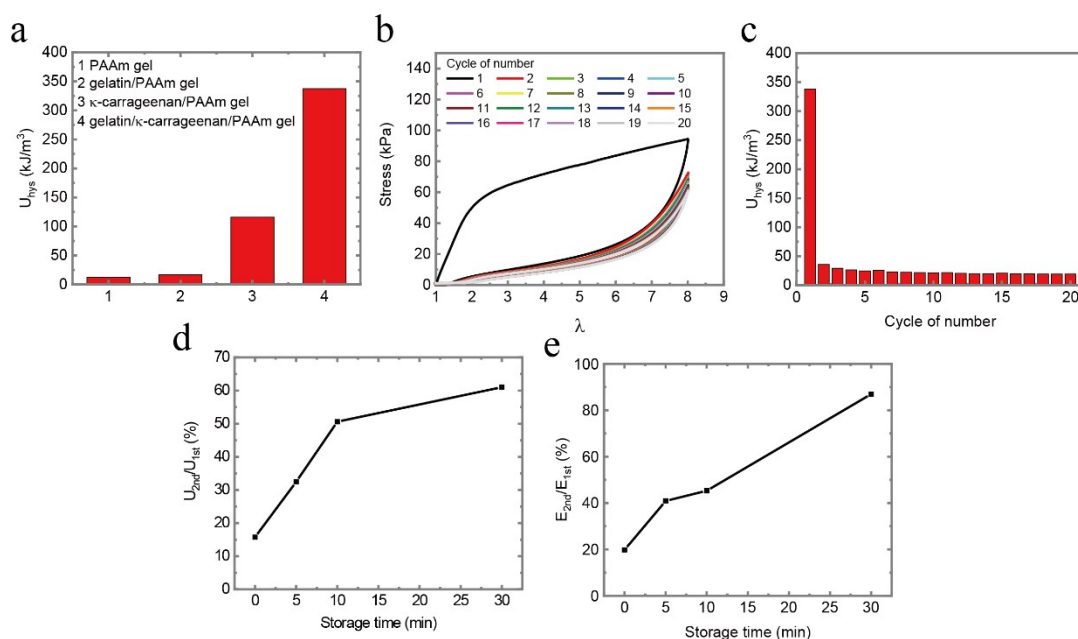

**Fig. S2** (a) Dissipated energies of PAAm gel, gelatin/PAAm gel,  $\kappa$ -carrageenan/PAAm gel and gelatin/ $\kappa$ -carrageenan/PAAm gel. (b) 20 successive cyclic tensile loops of gelatin/ $\kappa$ -carrageenan/PAAm gel with  $\lambda=8$  without waiting time and (c) corresponding dissipated energy of each loop. Recovery percentage of gelatin/ $\kappa$ -carrageenan/PAAm gels denoted by the ratios of (d) energy dissipation and (e) elastic modulus of the second loading-unloading cycle to that of original loading-unloading cycle as a function of duration time.

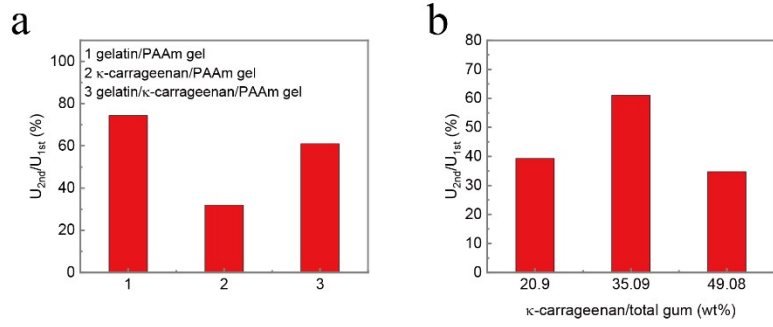

**Fig. S3** (a) Recovery percentage of gelatin/PAAm gel,  $\kappa$ -carrageenan/PAAm gel and gelatin/ $\kappa$ -carrageenan/PAAm gel. (b) Recovery percentage of gelatin/ $\kappa$ -carrageenan/PAAm gel of various fractions of  $\kappa$ -carrageenan to the total gum (20.9, 35.09, 49.08 wt%).

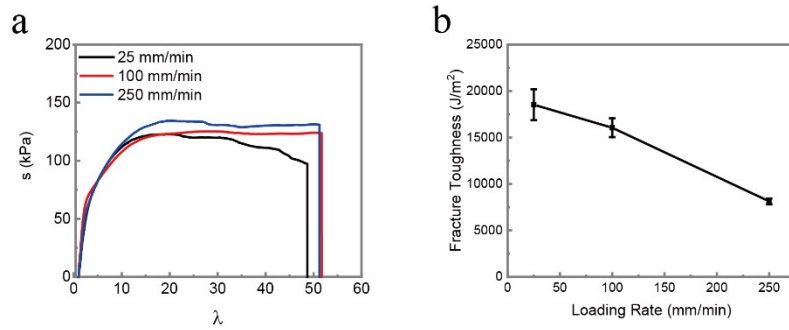

**Fig. S4** (a) Stress-stretch curves of gelatin/ $\kappa$ -carrageenan/PAAm gels at various loading rates. (b) Fracture toughness as a function of the loading rate.

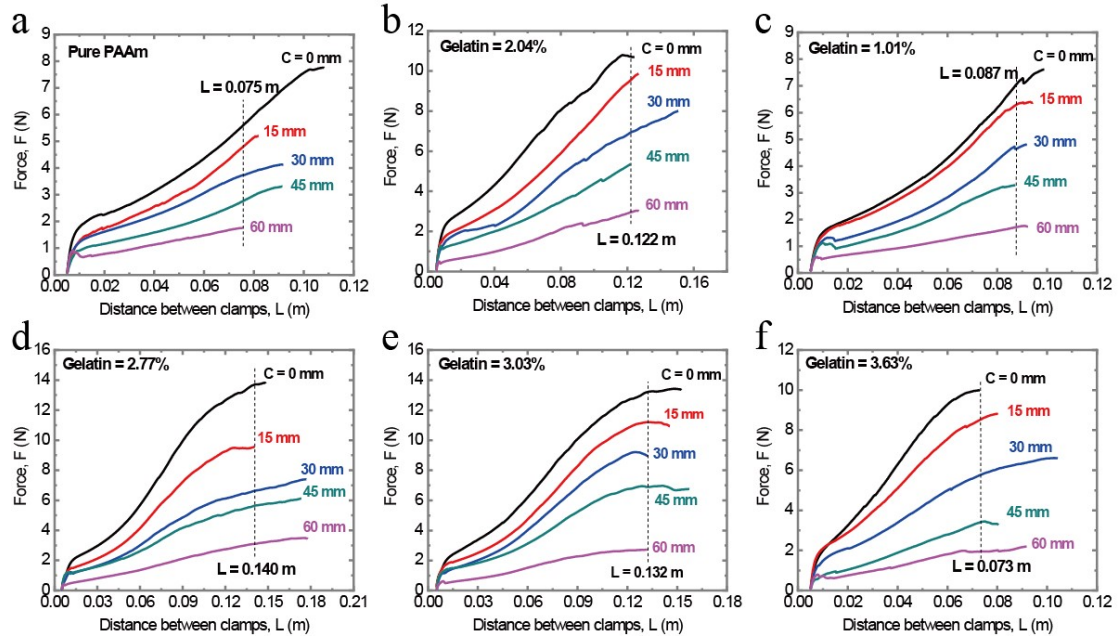

**Fig. S5** Force-extension curves for various initial crack sizes. An edge crack was introduced to gelatin-PAAm gel samples with various concentration of gelatin (w/v,  $v$  is the volume of water). (a) 0%, (b) 1.01%, (c) 2.04%, (d) 2.77%, (e) 3.03%, (f) 3.63%.

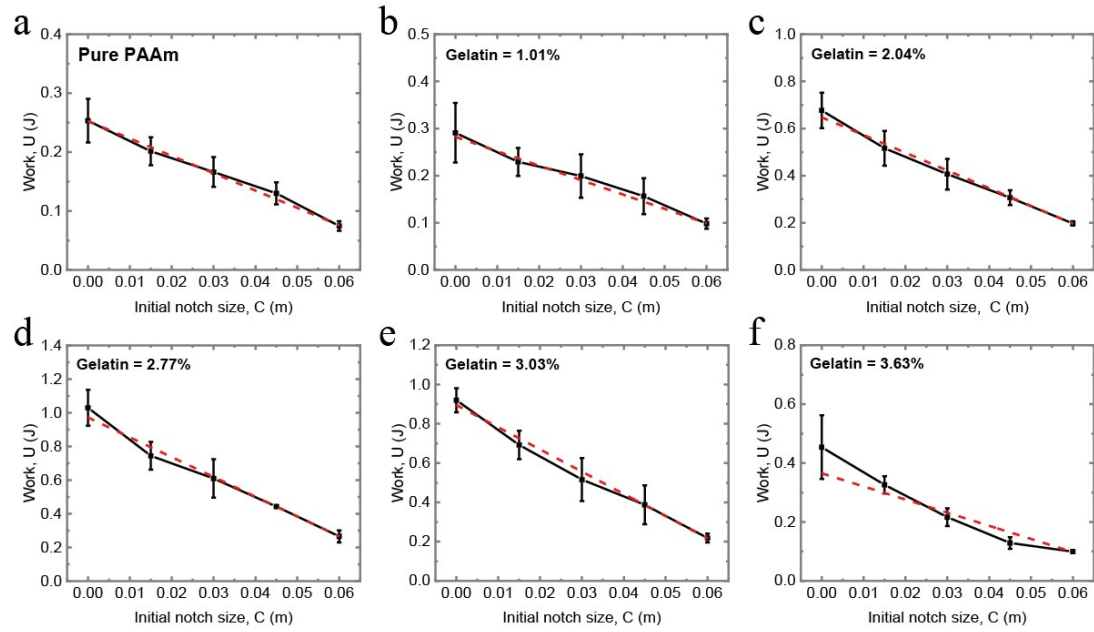

**Fig S6** The work,  $U$ , done in deforming gelatin/PAAm gel samples with various initial crack sizes with various concentration of gelatin (w/v, v is the volume of water). (a) 0%, (b) 1.01%, (c) 2.04%, (d) 2.77%, (e) 3.03%, (f) 3.63%.

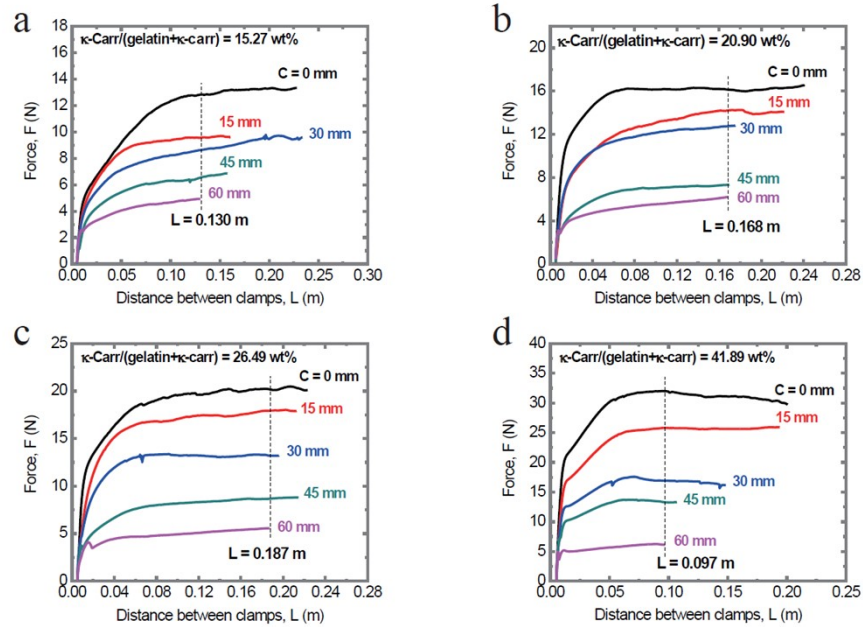

**Fig. S7** Force-extension curves for various initial crack sizes. An edge crack was introduced to gelatin/PAAm gel samples with various fractions of  $\kappa$ -carrageenan to the total gum (a) 15.27 wt%, (b) 20.90 wt%, (c) 26.49 wt%, (d) 41.89 wt%.

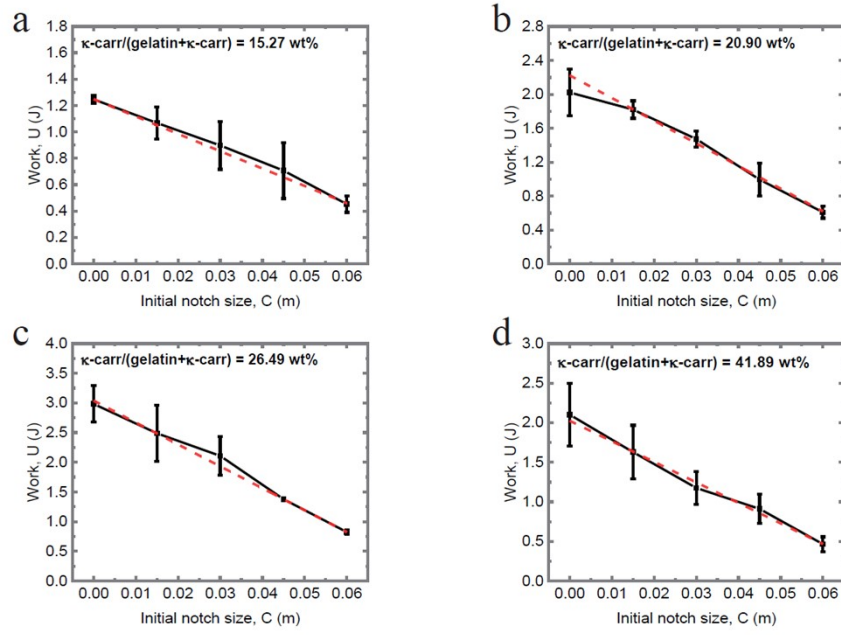

**Fig. S8** The work,  $U$ , done in deforming gelatin/ $\kappa$ -carrageenan/PAAm gel samples with various initial crack sizes with various fractions of  $\kappa$ -carrageenan to the total gum (a) 15.27 wt%, (b) 20.90 wt%, (c) 26.49 wt%, (d) 41.89 wt%.
